# Supplementary material for: Halogenation of epitaxial graphene grown on the Si-face of the SiC(0001) substrate and its further reaction with Grignard reagent
Source: Royal Society of Chemistry journal article supplement (doi:10.1039/c5nj02642c), 2015-12-02
Supplement: c5nj02642c1.pdf [file c5nj02642c1.pdf]

## Electronic Supplementary Information

*Submitted to New Journal of Chemistry*

# Halogenation of Epitaxial Graphene Grown on the Si-face of the SiC(0001) Substrate and its Further Reaction with Grignard Reagent

Md. Zakir Hossain<sup>a,\*</sup> Maisarah B. A. Razak<sup>a</sup>

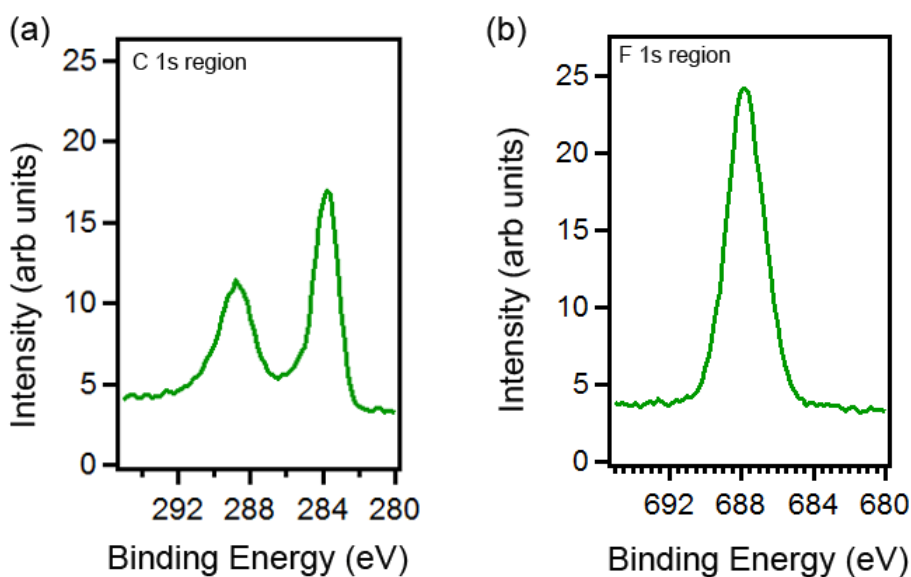

**ESI Figure 1.** Zoomed-in (a) C 1s and (b) F 1s regions of wide range XPS spectrum of fluorinated EG on SiC shown in figure 2(ii) of the main manuscript.

---

<sup>a</sup> *International Education and Research Center for Material Science, Graduate School of Science and Technology, Gunma University, Kiryu City, Gunma 376-8515, Japan.*

\* Corresponding author: E-mail: zakir@gunma-u.ac.jp; Tel. +81-277-30-1625

ESI figure 2 shows the wide range XPS spectra of epitaxial graphene (EG) on SiC exposed to F and the same fluorinated EG on SiC after treatment with 4(N,N-dimethyl)aniline magnesium bromide  $[(\text{CH}_3)_2\text{NC}_6\text{H}_4\text{MgBr}]$  in THF at 60 °C for 2 hours. Though the F 1s intensity is reduced following the Grignard reaction and washing procedures, no peak related to N 1s is observed in SI figure 2(ii). Thus we suggest that the fluorinated EG on SiC does not undergoes effective Grignard reaction as clearly observed for chlorinated EG.

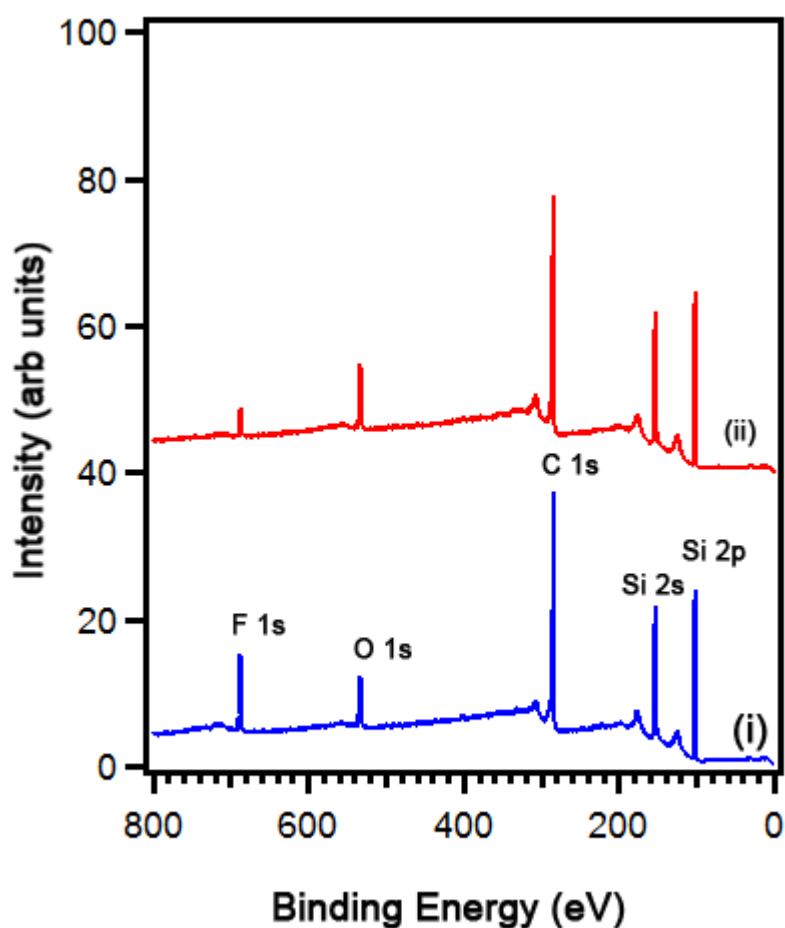

**ESI Figure 2.** Wide range XPS spectra of (i) EG on SiC exposed to F and (ii) the same surface after treatment with 4(N,N-dimethyl)aniline magnesium bromide  $[(\text{CH}_3)_2\text{NC}_6\text{H}_4\text{MgBr}]$  in THF at 60 °C.  $h\nu = 1486$  eV.
